# Supplementary material for: Truncatenolide, a Bioactive Disubstituted Nonenolide Produced by Colletotrichum truncatum, the Causal Agent of Anthracnose of Soybean in Argentina: Fungal Antagonism and SAR Studies
Source: PubMed Central journal article supplement (PMC9389607; doi:10.1021/acs.jafc.2c02502), 2022-08-04
Supplement: jf2c02502_si_001.pdf [file jf2c02502_si_001.pdf]

## **SUPPORTING INFORMATION**

**Truncatenolide a Bioactive Disubstituted Nonenolide Produced by *Colletotrichum truncatum*, the Causal Agent of Anthracnose of Soybean in Argentina. Fungal Antagonism and SAR Studies**

Marco Masi, Stefany Castaldi, Francisco Sautua, Gennaro Pescitelli,\* Marcelo Anibal Carmona and Antonio Evidente\*

## Supporting Information List

- Page 3: **Figure S1.**  $^1\text{H}$  NMR spectrum of truncanenolide, **1** ( $\text{CDCl}_3$ , 400 MHz).
- Page 3: **Figure S2.** COSY spectrum of truncanenolide, **1** ( $\text{CDCl}_3$ , 400 MHz).
- Page 4: **Figure S3.** NOESY spectrum of truncanenolide, **1** ( $\text{CDCl}_3$ , 400 MHz).
- Page 4: **Figure S4.** HSQC spectrum of of truncanenolide, **1** ( $\text{CDCl}_3$ , 400/100 MHz).
- Page 5: **Figure S5.** HMBC spectrum of of truncanenolide, **1** ( $\text{CDCl}_3$ , 400/100 MHz).
- Page 5: **Figure S6.**  $^{13}\text{C}$  NMR spectrum of truncanenolide, **1** ( $\text{CDCl}_3$ , 100 MHz).
- Page 6: **Figure S7.** HRESI MS spectrum of of truncanenolide, **1** recorded in positive modality.
- Page 6: **Figure S8.**  $^1\text{H}$  NMR spectrum of truncatenone, **2** ( $\text{CDCl}_3$ , 400 MHz).
- Page 7: **Figure S9.** COSY spectrum of truncatenone, **2** ( $\text{CDCl}_3$ , 400 MHz).
- Page 7: **Figure S10.** NOESY spectrum of truncatenone, **2** ( $\text{CDCl}_3$ , 400 MHz).
- Page 8: **Figure S11.** HSQC spectrum of truncatenone, **2** ( $\text{CDCl}_3$ , 400/100 MHz).
- Page 8: **Figure S12.** HMBC spectrum of truncatenone, **2** ( $\text{CDCl}_3$ , 400/100 MHz).
- Page 9: **Figure S13.**  $^{13}\text{C}$  NMR spectrum of truncatenone, **2** ( $\text{CDCl}_3$ , 100 MHz).
- Page 9: **Figure S14.** HRESI MS spectrum truncatenone, **2** recorded in positive modality.
- Page 10: **Figure S15.** Conformers of truncatenolide, **1**
- Page 11: **Table S1** and **Table S2.** Computational data (DP4 analysis).

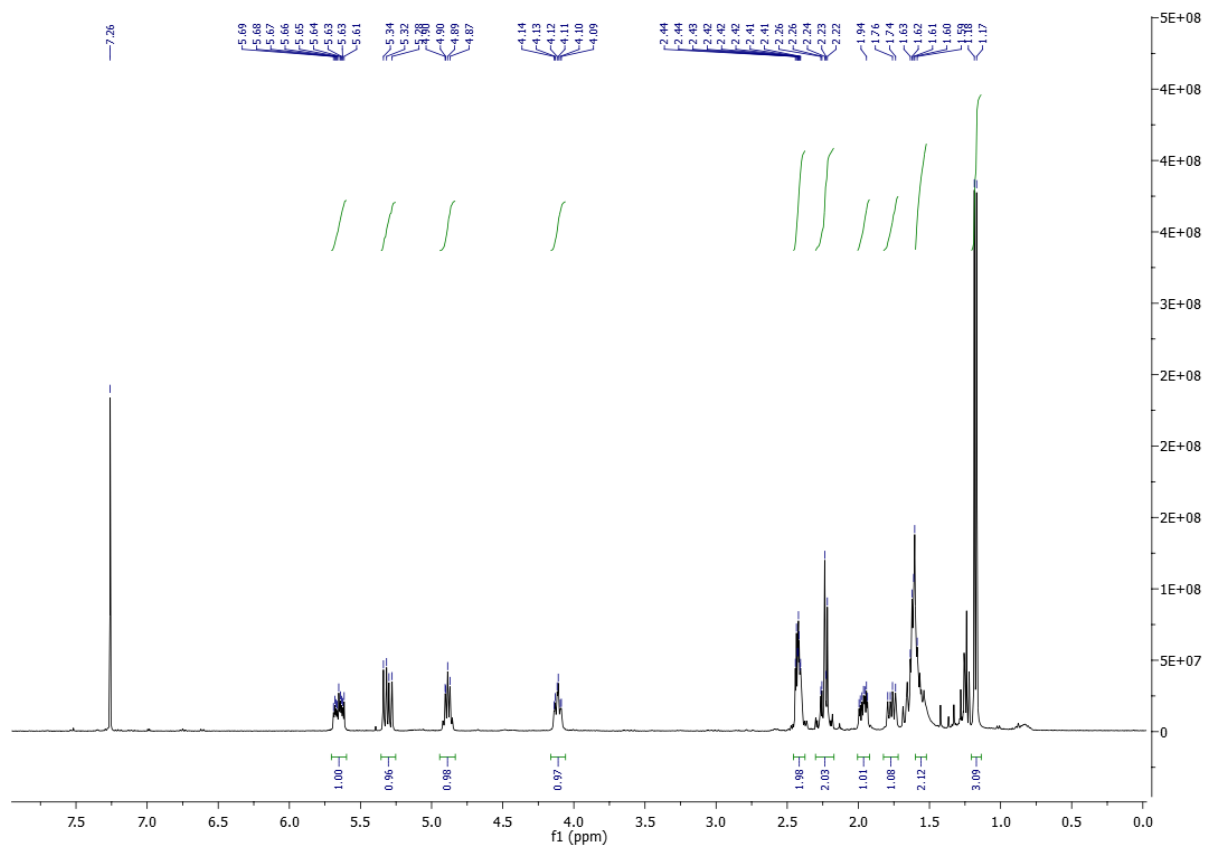

**Figure S1.**  $^1\text{H}$  NMR spectrum of trucantenolide, **1** ( $\text{CDCl}_3$ , 400 MHz).

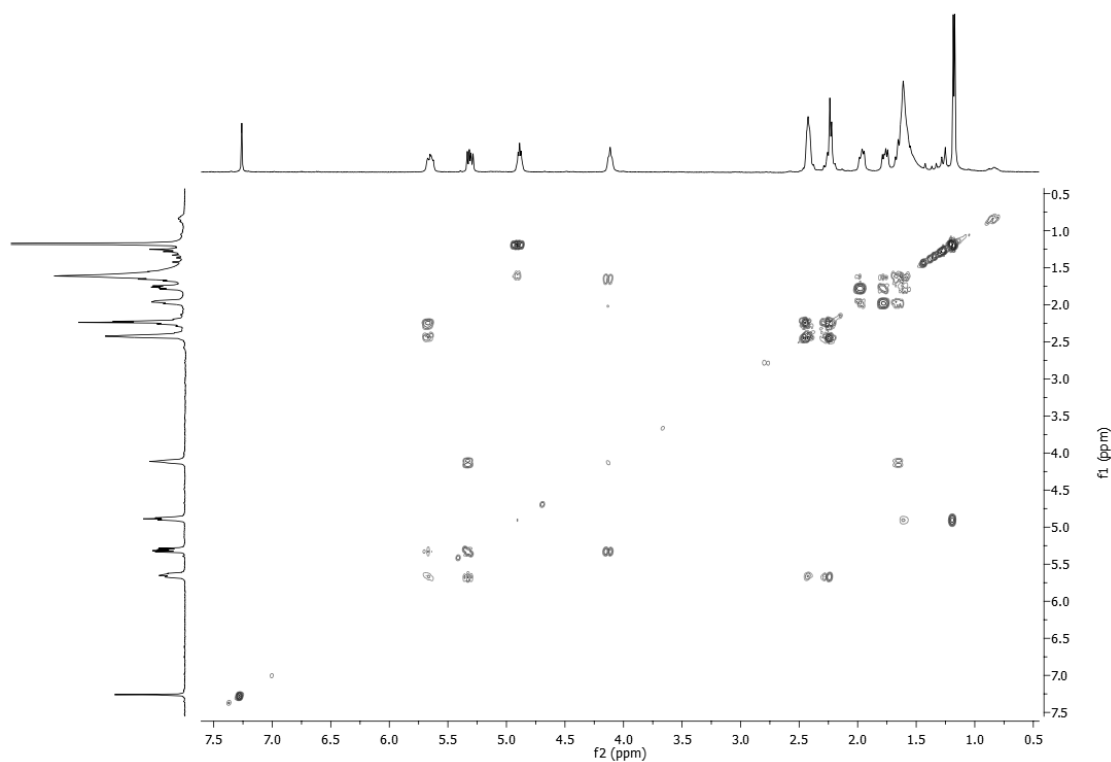

**Figure S2.** COSY spectrum of trucantenolide, **1** ( $\text{CDCl}_3$ , 400 MHz).

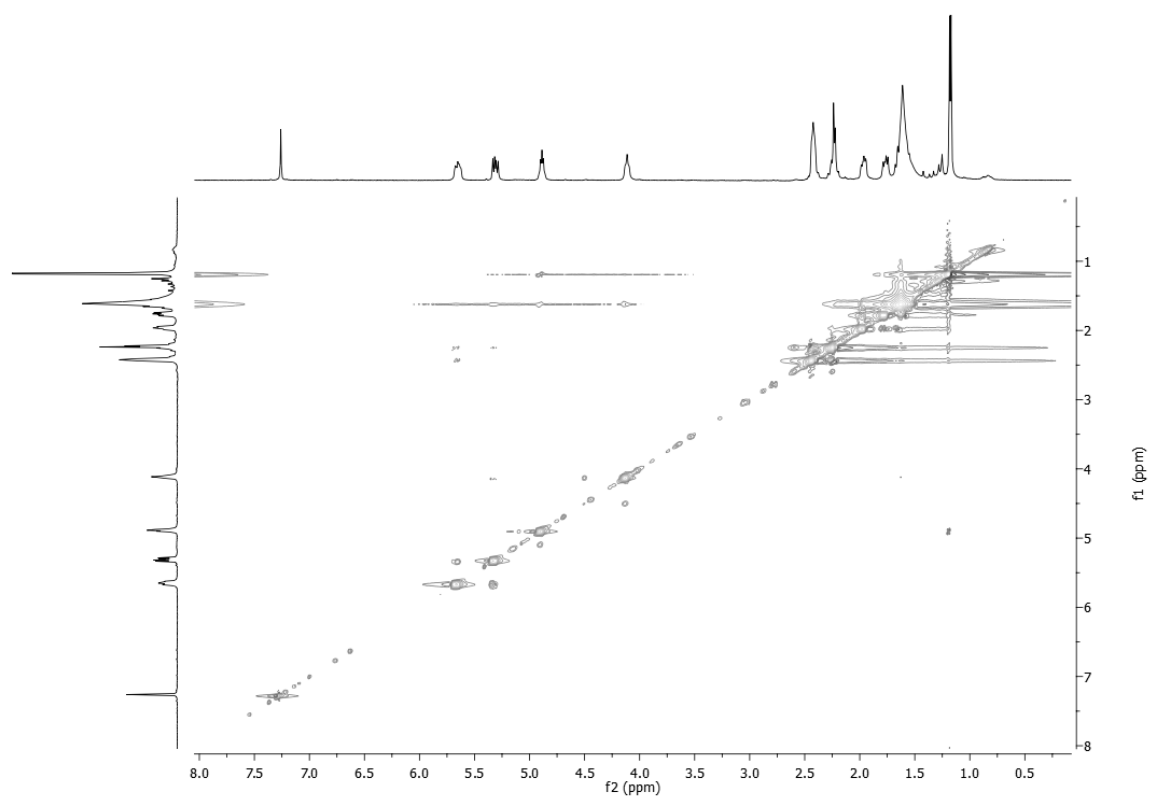

**Figure S3.** NOESY spectrum of trucantenolide, **1** (CDCl<sub>3</sub>, 400 MHz).

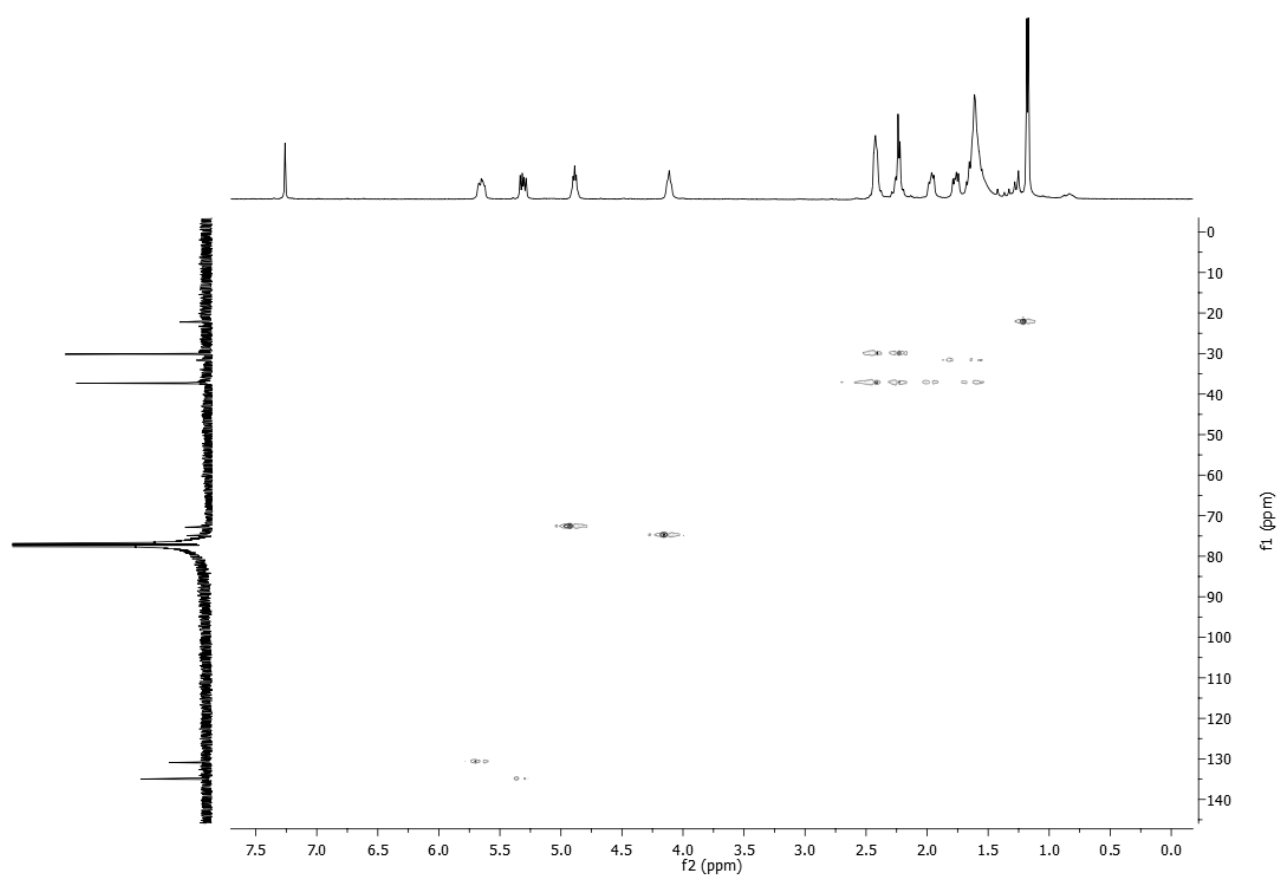

**Figure S4.** HSQC spectrum of of trucantenolide, **1** (CDCl<sub>3</sub>, 400/100 MHz).

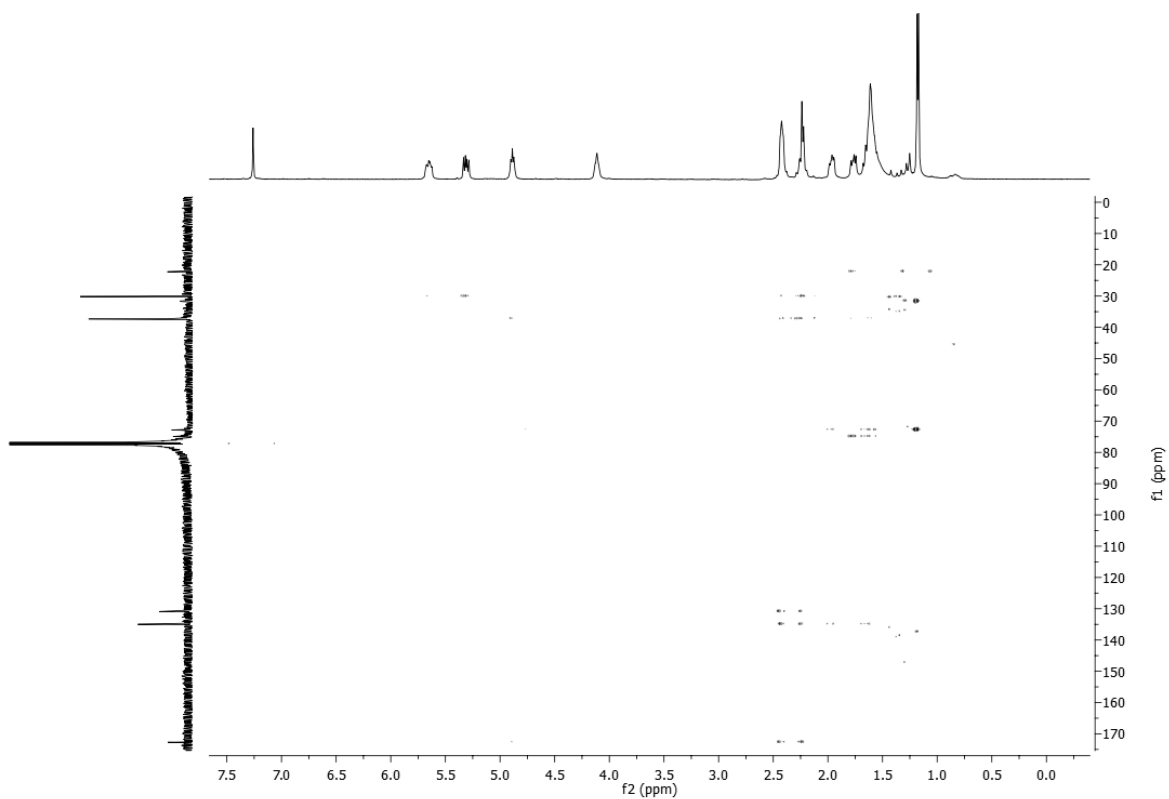

**Figure S5.** HMBC spectrum of of trucantenolide, **1** (CDCl<sub>3</sub>, 400/100 MHz).

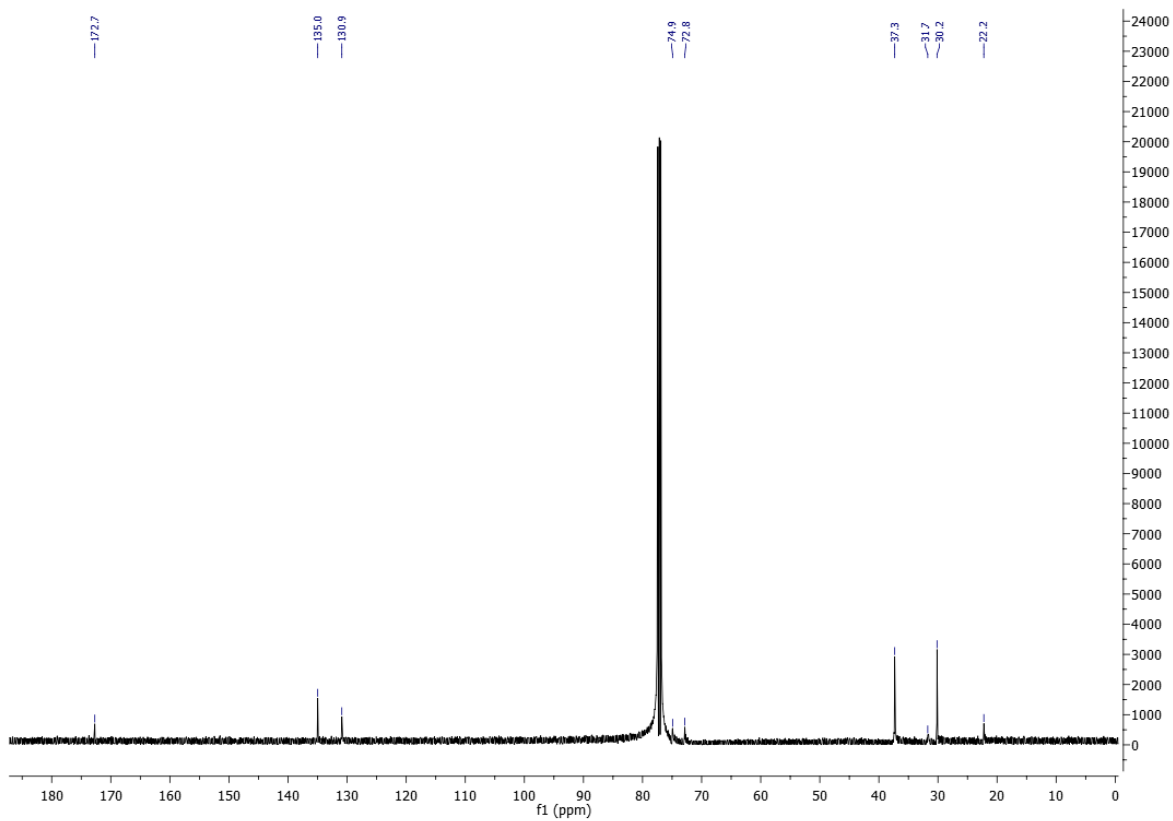

**Figure S6.** <sup>13</sup>C NMR spectrum of trucantenolide, **1** (CDCl<sub>3</sub>, 100 MHz).

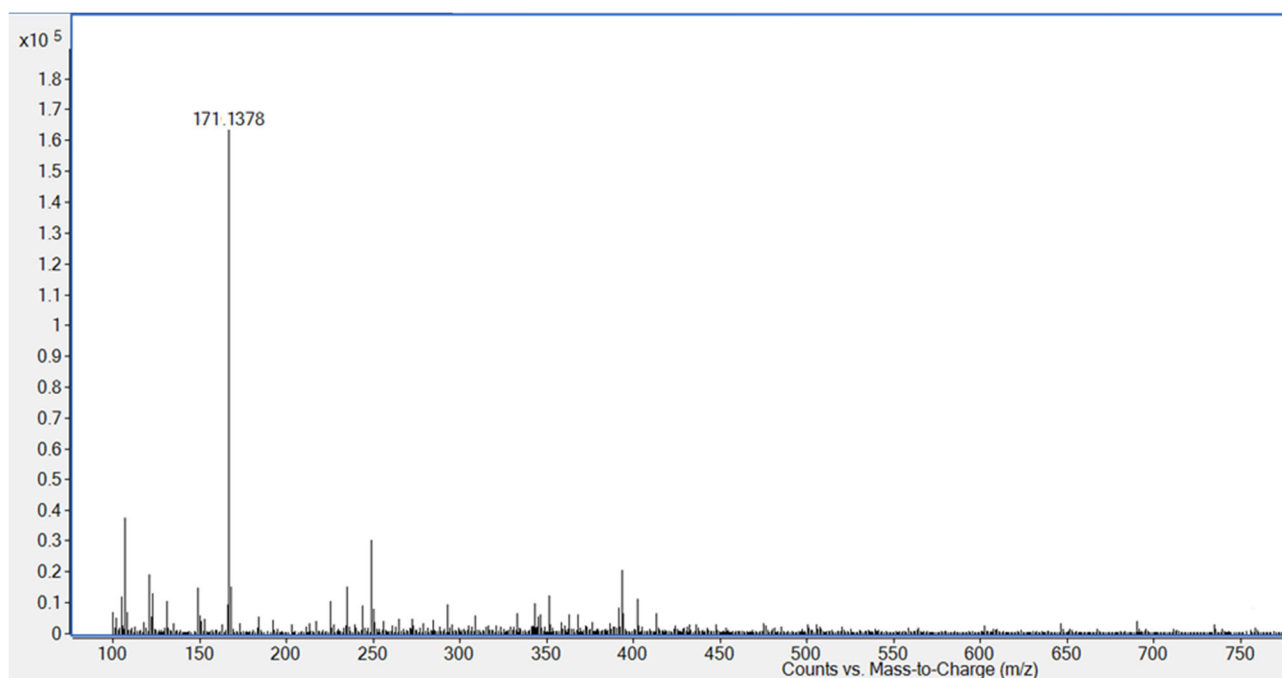

**Figure S7.** HRESI MS spectrum of of truncatenolide, **1** recorded in positive modality.

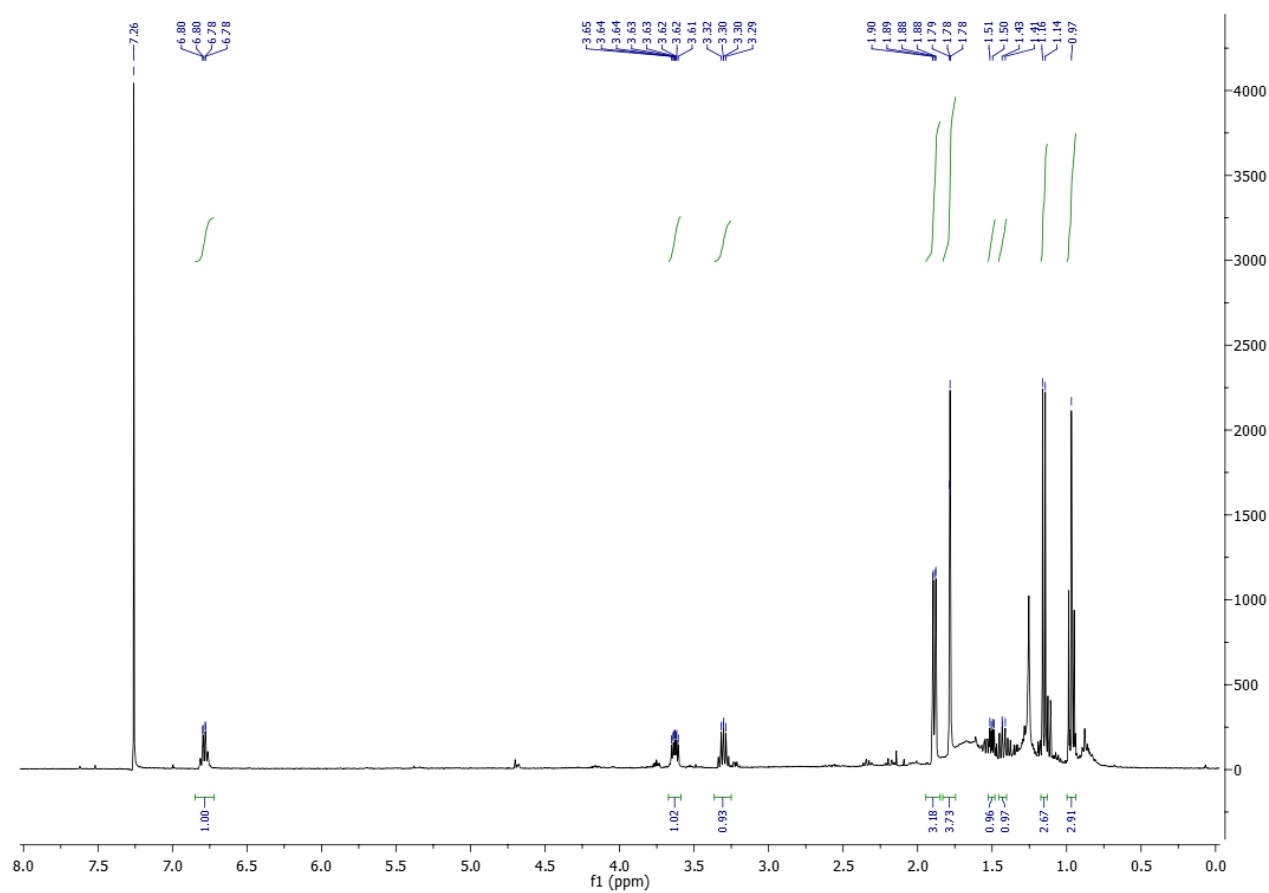

**Figure S8.**  $^1\text{H}$  NMR spectrum of truncatenone, **2** ( $\text{CDCl}_3$ , 400 MHz).

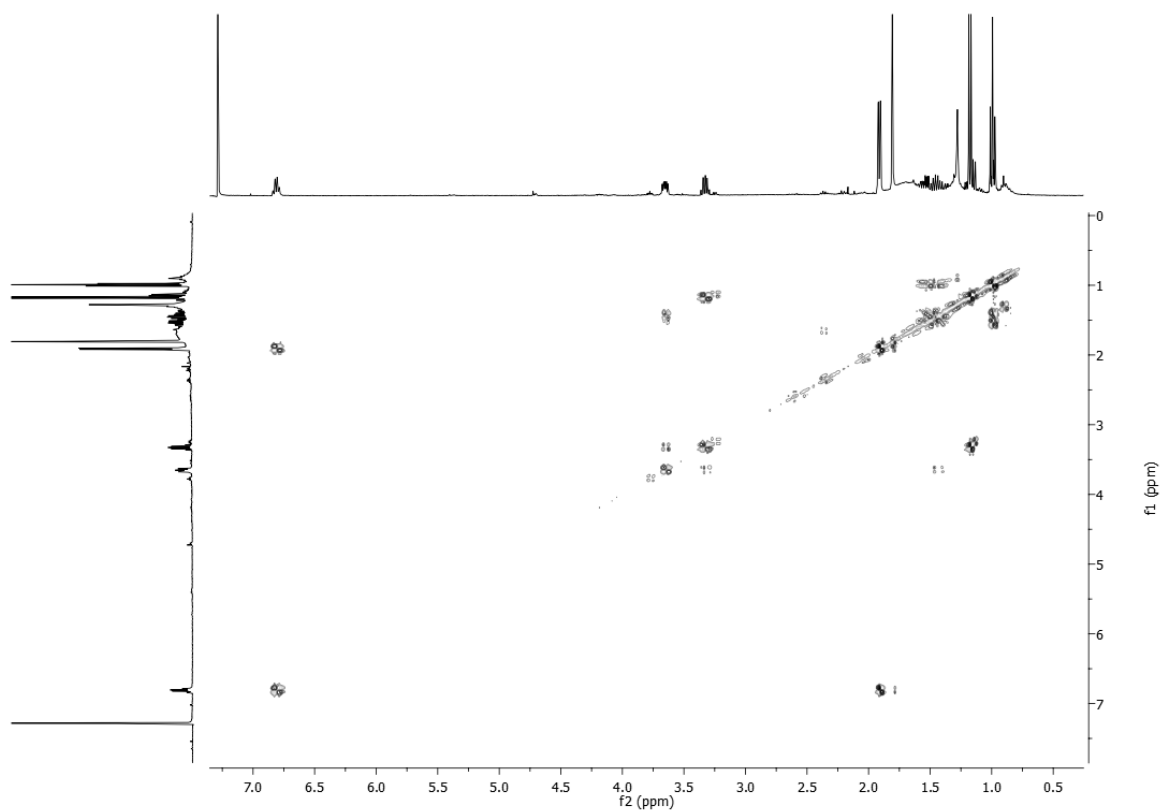

**Figure S9.** COSY spectrum of truncatenone, **2** (CDCl<sub>3</sub>, 400 MHz).

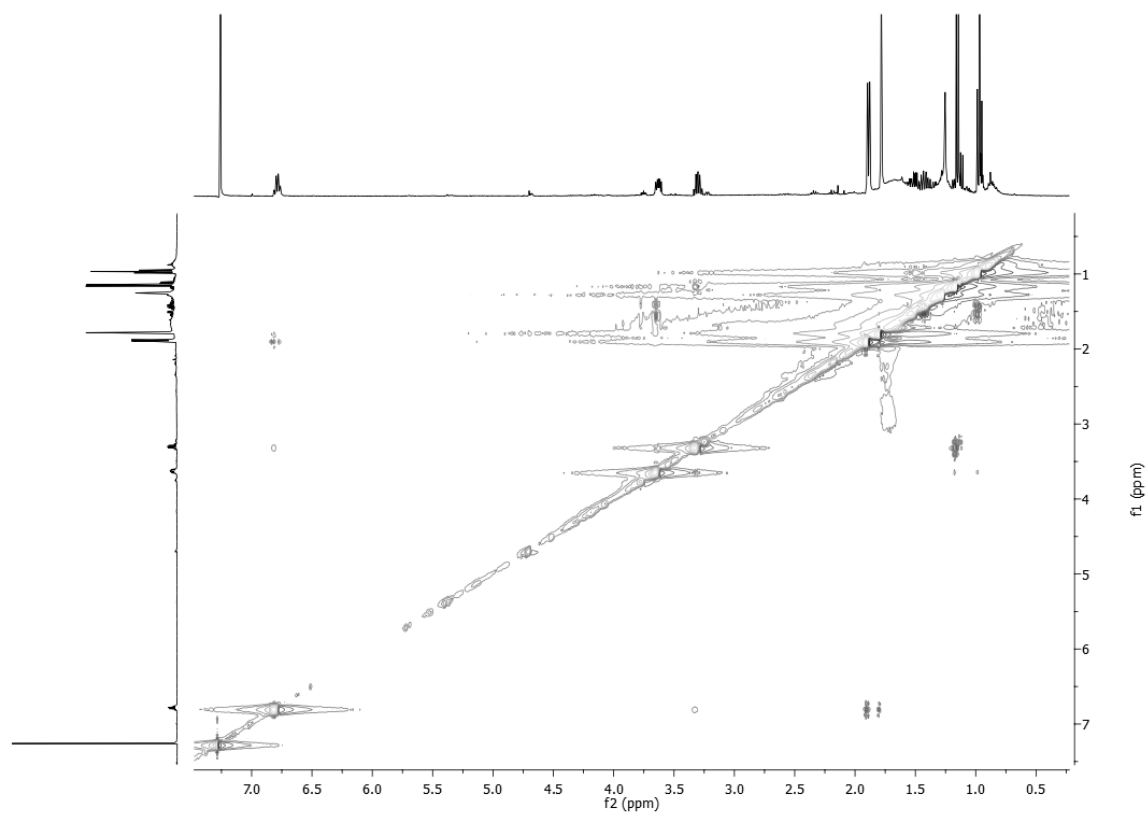

**Figure S10.** NOESY spectrum of truncatenone, **2** (CDCl<sub>3</sub>, 400 MHz).

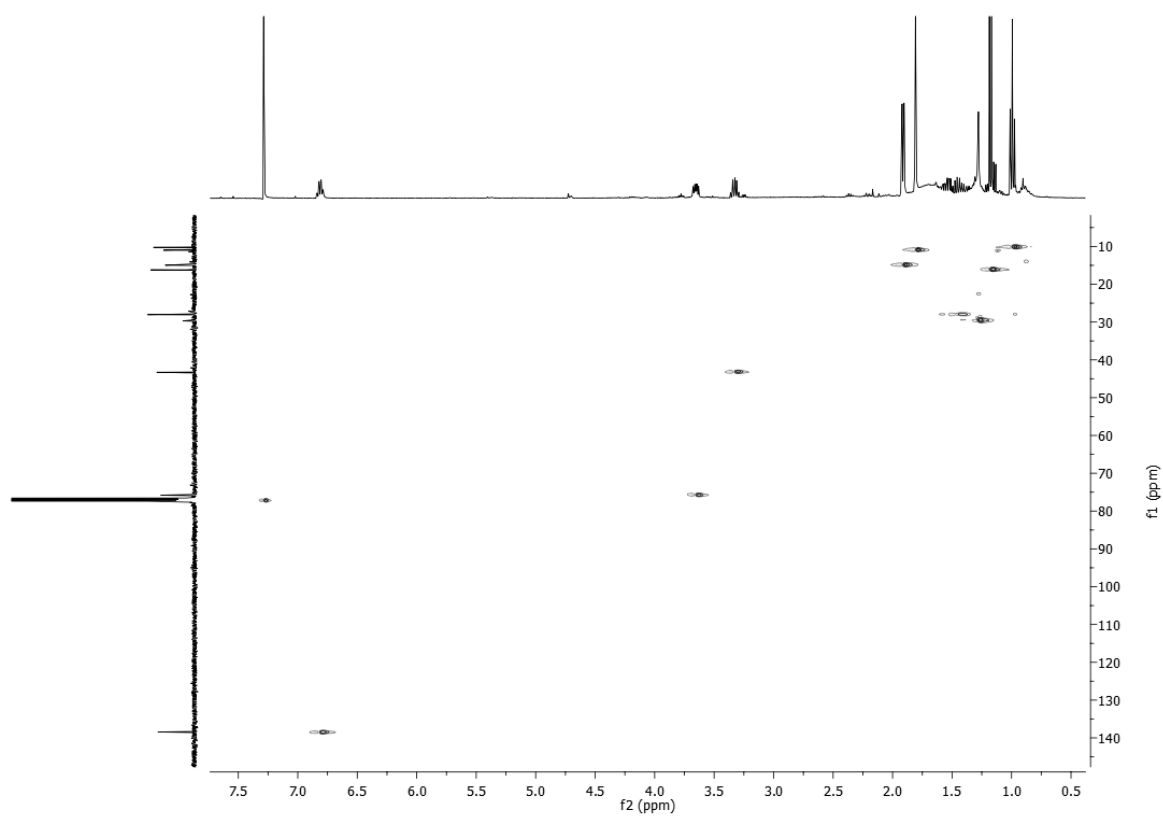

Figure S11. HSQC spectrum of truncatenone, **2** (CDCl<sub>3</sub>, 400/100 MHz).

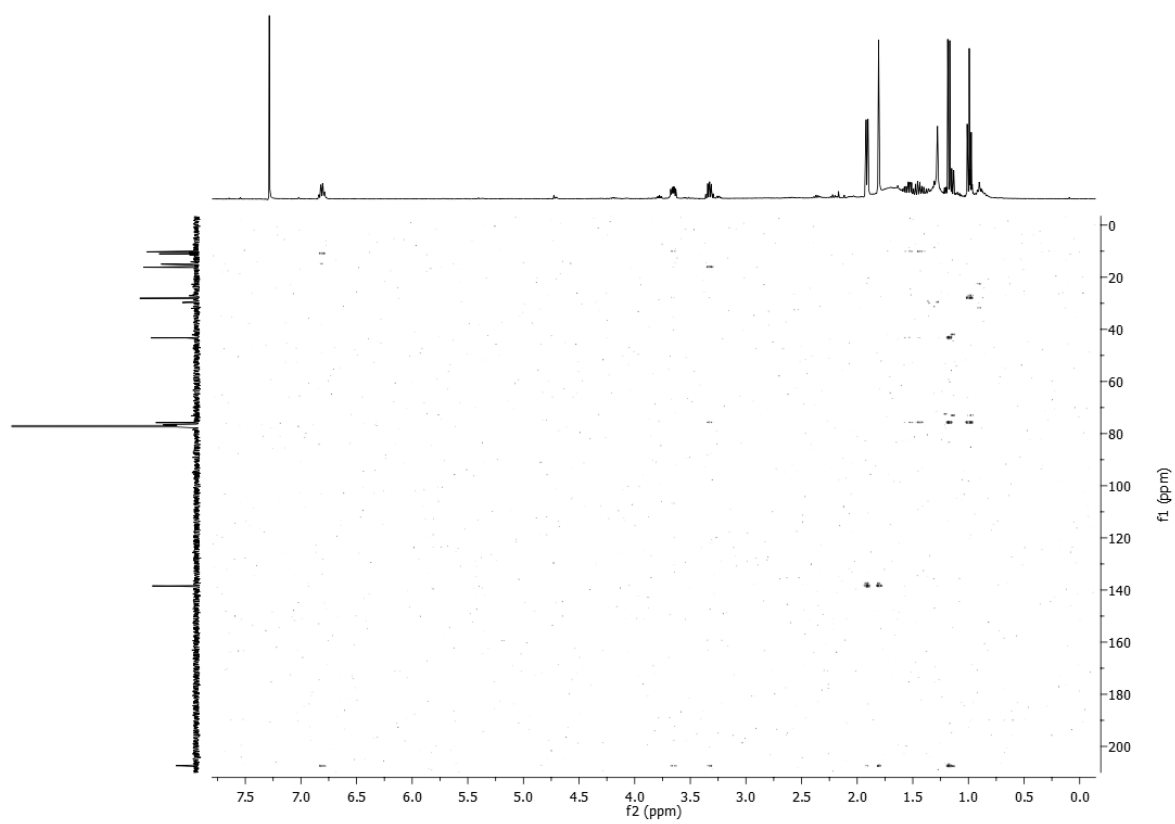

Figure S12. HMBC spectrum of truncatenone, **2** (CDCl<sub>3</sub>, 400/100 MHz).



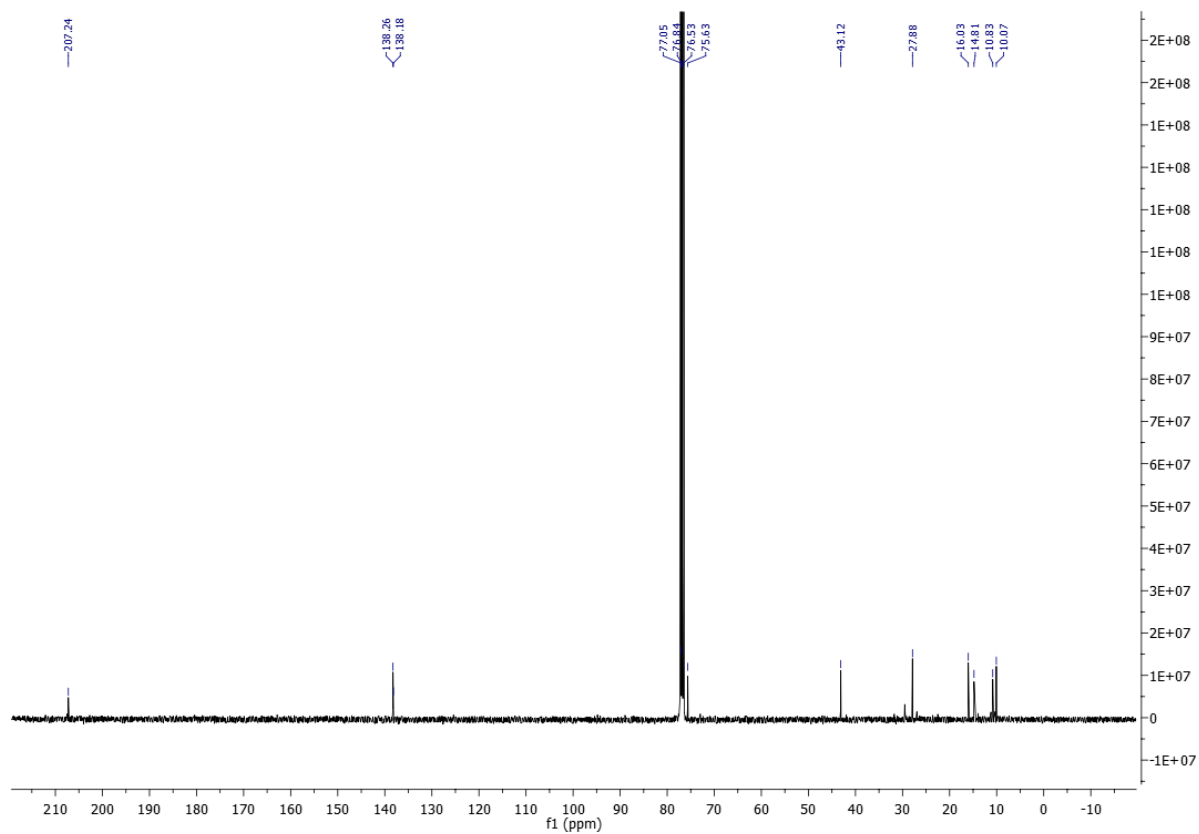

**Figure S13.** <sup>13</sup>C NMR spectrum of truncatenone, **2** (CDCl<sub>3</sub>, 100 MHz).

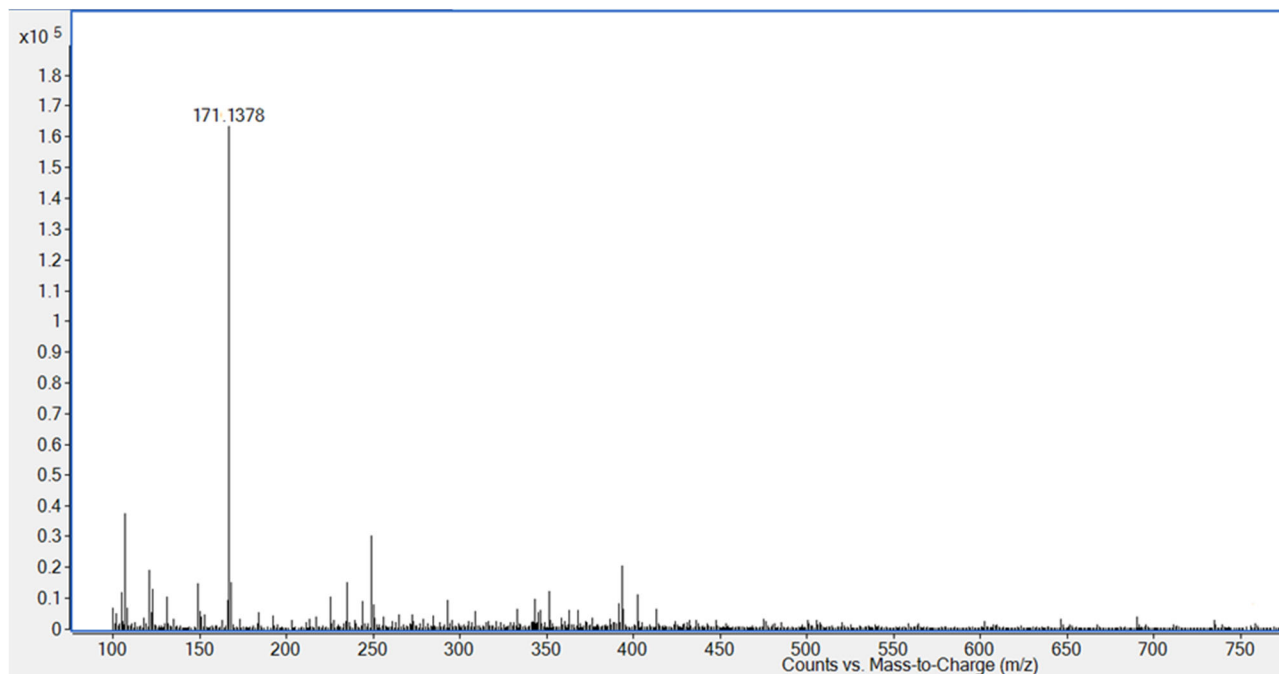

**Figure S14.** HRESI MS spectrum truncatenone, **2** recorded in positive modality.

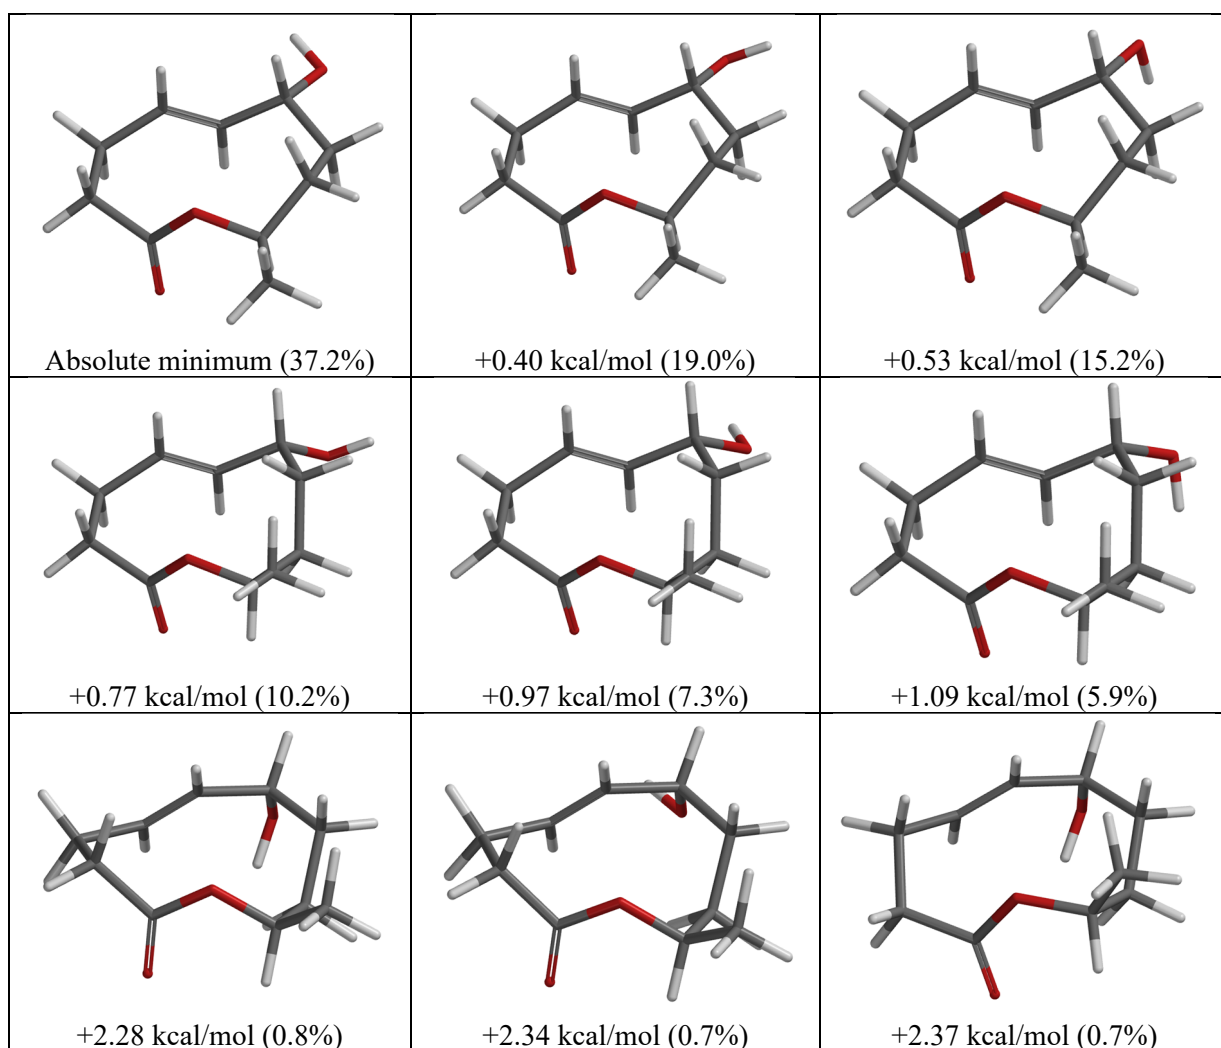

**Figure S15.** Low-energy conformers, relative internal energy and Boltzmann population at 300K calculated for compound (7*R*,10*R*)-1 at  $\omega$ B97X-D/6-311+G(d,p) level, including the Solvation Model based on Density (SMD) for acetonitrile.

**Table S1.** Summary of DP4+ test on (7*R*,10*S*)-1 (isomer 1) and (7*R*,10*R*)-1 (isomer 2). See Computational Section (main text) for details.

| Functional       |      | Solvent?                                                                          | Basis Set |                                                                                   |          | Type of Data  |          |
|------------------|------|-----------------------------------------------------------------------------------|-----------|-----------------------------------------------------------------------------------|----------|---------------|----------|
| B3LYP            |      | Gas Phase                                                                         | 6-31G(d)  |                                                                                   |          | Scaled Shifts |          |
|                  |      | DP4+                                                                              | -         | -                                                                                 | -        | -             | -        |
| Nuclei           | sp2? | Experimental                                                                      | Isomer 1  | Isomer 2                                                                          | Isomer 3 | Isomer 4      | Isomer 5 |
| C                | x    | 172.7                                                                             | 173.6     | 173.2                                                                             |          |               |          |
| C                |      | 37.3                                                                              | 36.4      | 36.4                                                                              |          |               |          |
| C                |      | 30.2                                                                              | 31.4      | 31.6                                                                              |          |               |          |
| C                | x    | 130.9                                                                             | 127.6     | 131.6                                                                             |          |               |          |
| C                | x    | 135                                                                               | 137.6     | 137.1                                                                             |          |               |          |
| C                |      | 74.9                                                                              | 69.6      | 75.6                                                                              |          |               |          |
| C                |      | 37.3                                                                              | 34.9      | 36.4                                                                              |          |               |          |
| C                |      | 31.7                                                                              | 27.7      | 31.4                                                                              |          |               |          |
| C                |      | 72.8                                                                              | 71.6      | 72.6                                                                              |          |               |          |
| C                |      | 22.2                                                                              | 21.2      | 21.6                                                                              |          |               |          |
|                  |      |                                                                                   | Isomer 1  | Isomer 2                                                                          |          |               |          |
| sDP4+ (H data)   |      |                                                                                   | -         | -                                                                                 |          |               |          |
| sDP4+ (C data)   |      |  | 0.00%     |  | 100.00%  |               |          |
| sDP4+ (all data) |      |  | 0.00%     |  | 100.00%  |               |          |

**Table S2.** Summary of DP4+ test on (5*R*,6*S*)-2 (isomer 1) and (5*S*,6*S*)-2 (isomer 2). See Computational Section (main text) for details.

| Functional       |      | Solvent?                                                                            | Basis Set |                                                                                     |          | Type of Data  |          |
|------------------|------|-------------------------------------------------------------------------------------|-----------|-------------------------------------------------------------------------------------|----------|---------------|----------|
| B3LYP            |      | Gas Phase                                                                           | 6-31G(d)  |                                                                                     |          | Scaled Shifts |          |
|                  |      | DP4+                                                                                | -         | -                                                                                   | -        | -             | -        |
| Nuclei           | sp2? | Experimental                                                                        | Isomer 1  | Isomer 2                                                                            | Isomer 3 | Isomer 4      | Isomer 5 |
| C                |      | 14.8                                                                                | 17.3      | 16.8                                                                                |          |               |          |
| C                | x    | 138.3                                                                               | 145.0     | 143.6                                                                               |          |               |          |
| C                | x    | 138.2                                                                               | 134.6     | 135.3                                                                               |          |               |          |
| C                |      | 10.8                                                                                | 22.4      | 22.3                                                                                |          |               |          |
| C                | x    | 207.2                                                                               | 212.4     | 212.0                                                                               |          |               |          |
| C                |      | 43.1                                                                                | 45.7      | 47.4                                                                                |          |               |          |
| C                |      | 16                                                                                  | 11.1      | 16.1                                                                                |          |               |          |
| C                |      | 75.6                                                                                | 72.1      | 74.4                                                                                |          |               |          |
| C                |      | 27.9                                                                                | 27.7      | 28.3                                                                                |          |               |          |
| C                |      | 10.1                                                                                | 12.3      | 11.7                                                                                |          |               |          |
|                  |      |                                                                                     | Isomer 1  | Isomer 2                                                                            |          |               |          |
| sDP4+ (H data)   |      |                                                                                     | -         | -                                                                                   |          |               |          |
| sDP4+ (C data)   |      |  | 0.13%     |  | 99.87%   |               |          |
| sDP4+ (all data) |      |  | 0.13%     |  | 99.87%   |               |          |
